CORRECTION

# Correction: Long-Term Urban Market Dynamics Reveal Increased Bushmeat Carcass Volume despite Economic Growth and Proactive Environmental Legislation on Bioko Island, Equatorial Guinea

The *PLOS ONE* Staff

## Notice of Republication

This article was republished on August 19, 2015, because part of Table 2 was erroneously omitted during the typesetting process. The publisher apologizes for the errors. Please visit this article again to view the correct version. The PDF of this article was not affected.

## Reference

1. Cronin DT, Woloszynek S, Morra WA, Honarvar S, Linder JM, Gonder MK, et al. (2015) Long-Term Urban Market Dynamics Reveal Increased Bushmeat Carcass Volume despite Economic Growth and Proactive Environmental Legislation on Bioko Island, Equatorial Guinea. *PLoS ONE* 10(7): e0134464. doi:[10.1371/journal.pone.0134464](https://doi.org/10.1371/journal.pone.0134464) PMID: [26230504](https://pubmed.ncbi.nlm.nih.gov/26230504/)

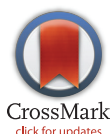

## OPEN ACCESS

**Citation:** The *PLOS ONE* Staff (2015) Correction: Long-Term Urban Market Dynamics Reveal Increased Bushmeat Carcass Volume despite Economic Growth and Proactive Environmental Legislation on Bioko Island, Equatorial Guinea. *PLoS ONE* 10(8): e0137470. doi:[10.1371/journal.pone.0137470](https://doi.org/10.1371/journal.pone.0137470)

**Published:** August 28, 2015

**Copyright:** © 2015 The PLOS ONE Staff. This is an open access article distributed under the terms of the [Creative Commons Attribution License](https://creativecommons.org/licenses/by/4.0/), which permits unrestricted use, distribution, and reproduction in any medium, provided the original author and source are credited.
